# Supplementary material for: CDK9-dependent RNA polymerase II pausing controls transcription initiation
Source: eLife journal article supplement (doi:10.7554/elife.29736), 2017-10-10
Supplement: supp [file elife-29736-supp-v1.zip]

Archive with 9 entries (9 files):
- elife_poa_e29736_Figure_4_figure_supplement_1.pdf
- elife_poa_e29736_Transparent_Reporting_File.pdf
- elife_poa_e29736_Figure_7_figure_supplement_1.pdf
- elife_poa_e29736_Figure_1_figure_supplement_2.pdf
- elife_poa_e29736_Figure_4_figure_supplement_2.pdf
- elife_poa_e29736_Figure_1_figure_supplement_1.pdf
- elife_poa_e29736_Figure_3_figure_supplement_1.pdf
- elife_poa_e29736_Figure_2_figure_supplement_1.pdf
- elife_poa_e29736_Supplementary_File_1.docx
