# Supplementary figures and images for: CDK9-dependent RNA polymerase II pausing controls transcription initiation
Source: eLife journal article supplement (doi:10.7554/elife.29736), 2017-10-10

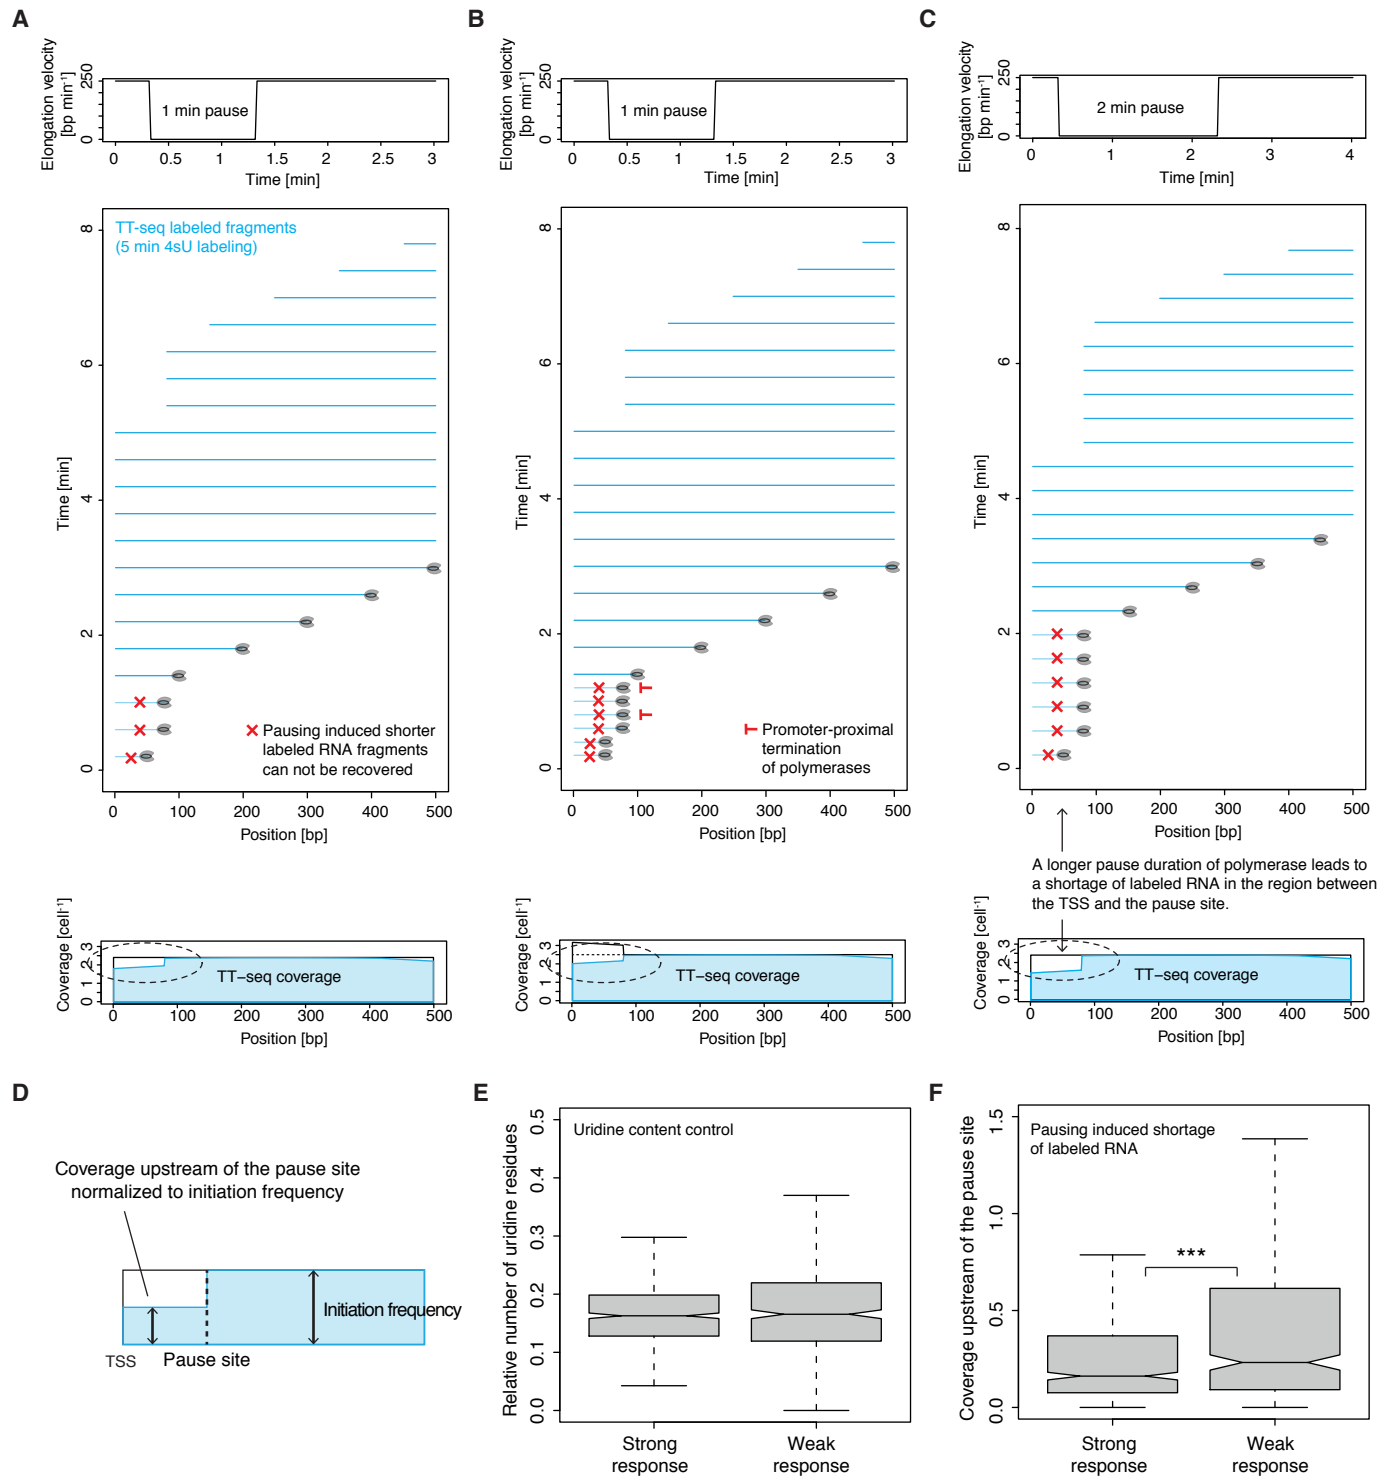

Supplement: supp [file elife-29736-supp-v1.zip › elife_poa_e29736_Figure_4_figure_supplement_1.pdf]

**A**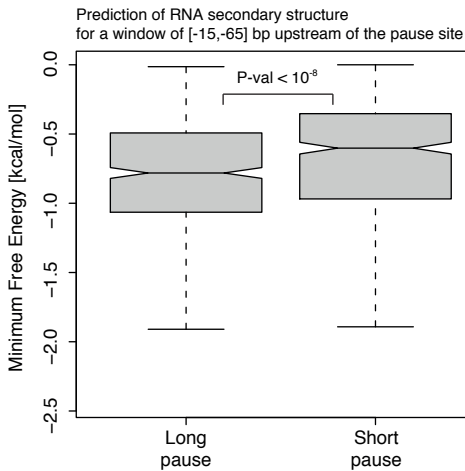**B**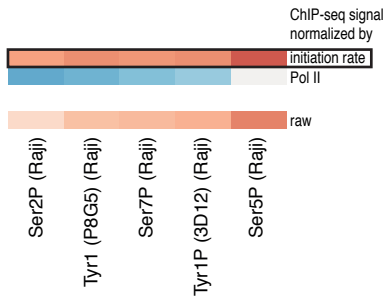**C**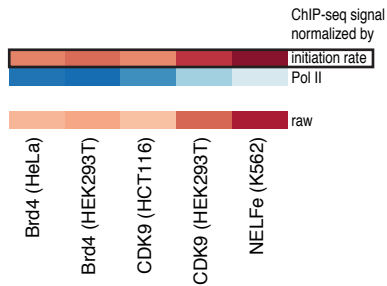

Supplement: supp [file elife-29736-supp-v1.zip › elife_poa_e29736_Figure_7_figure_supplement_1.pdf]

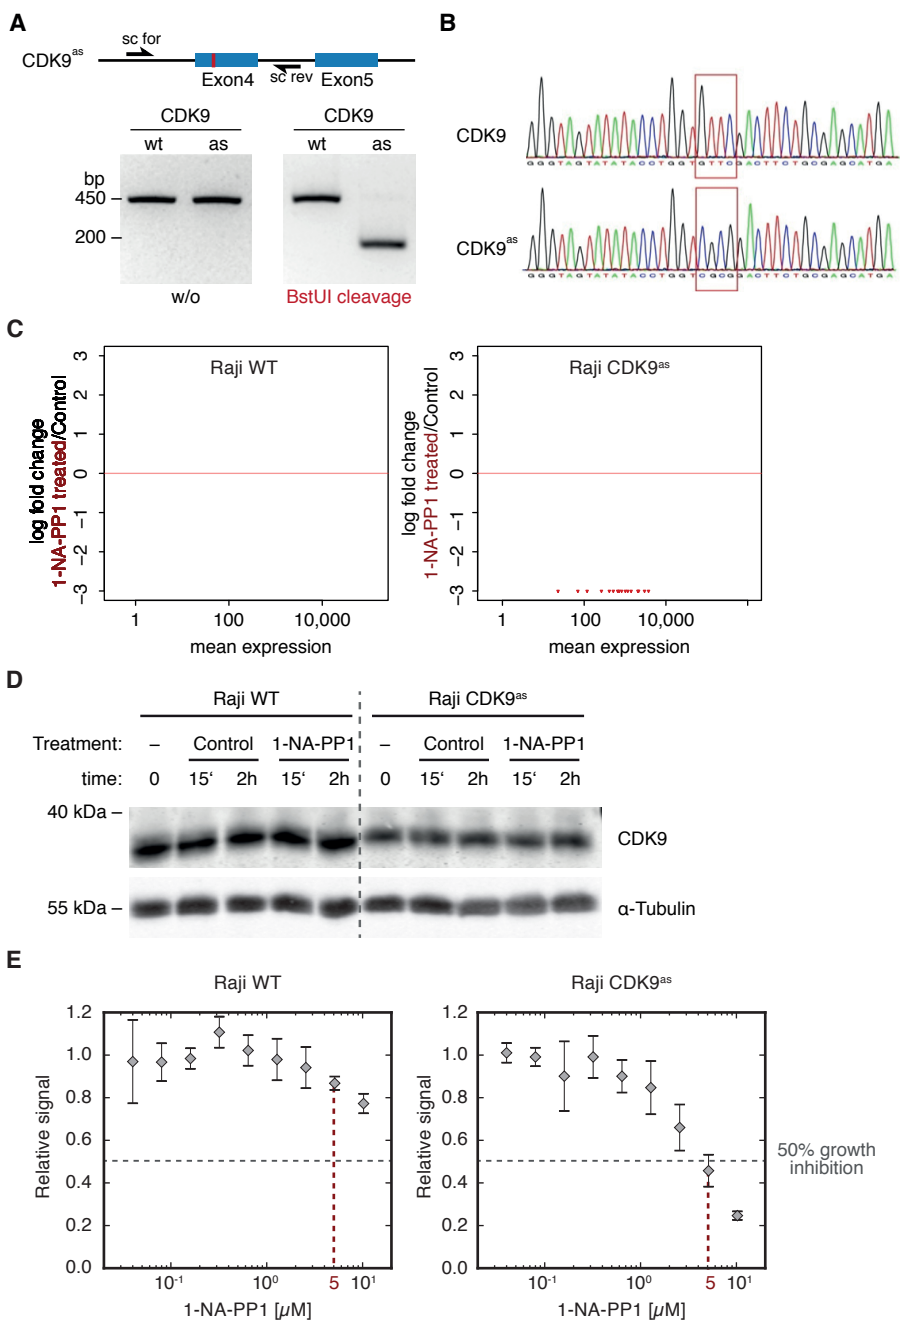

Supplement: supp [file elife-29736-supp-v1.zip › elife_poa_e29736_Figure_1_figure_supplement_2.pdf]

**A**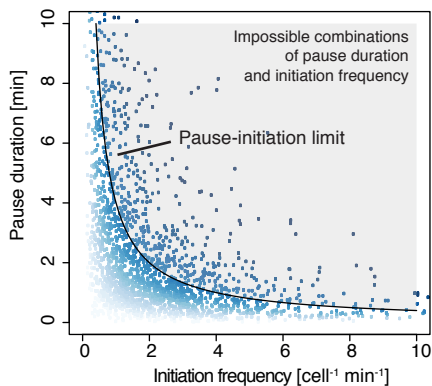**B**

Pause duration  $d = 1 / \text{elongation velocity } v$

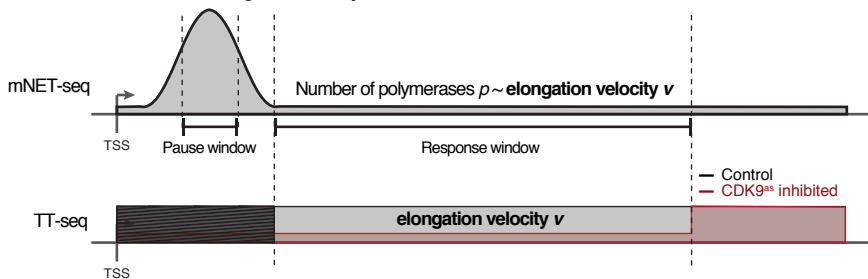**C**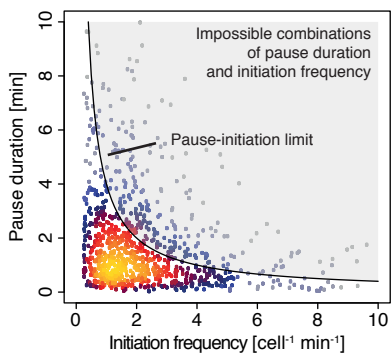**D**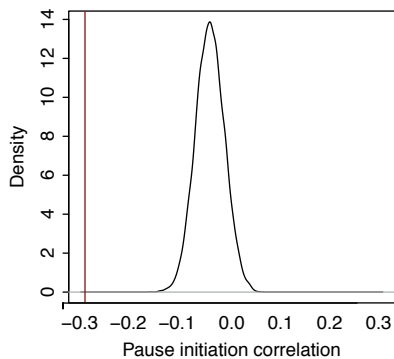**E**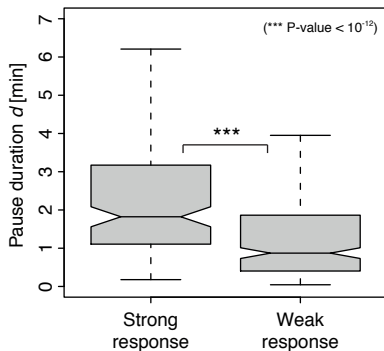**F**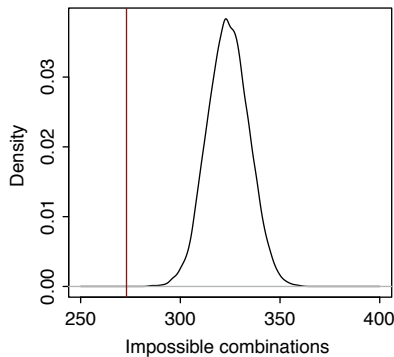

Supplement: supp [file elife-29736-supp-v1.zip › elife_poa_e29736_Figure_4_figure_supplement_2.pdf]

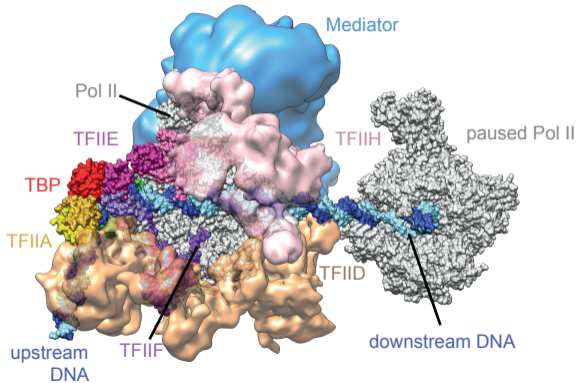

Supplement: supp [file elife-29736-supp-v1.zip › elife_poa_e29736_Figure_1_figure_supplement_1.pdf]

**A**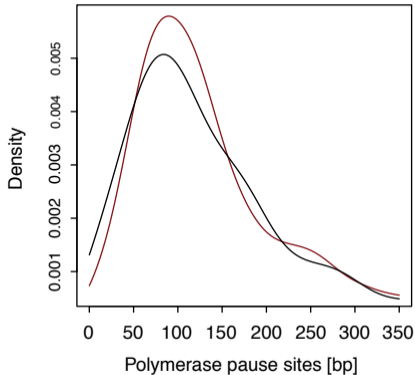**B**

(2,135 sequences)

| pval      |    |    |    |   |   |   |   | occ | odds |
|-----------|----|----|----|---|---|---|---|-----|------|
| 6.08e-137 |    |    |    | C | G |   |   | 669 | 8.16 |
| 6.04e-97  |    |    | G  | C |   |   |   | 643 | 4.80 |
| 5.07e-34  |    |    |    |   | G | C |   | 434 | 2.66 |
| 3.41e-33  | G  | G  |    |   |   |   |   | 465 | 2.49 |
| 4.13e-30  |    |    | C  | C |   |   |   | 421 | 2.51 |
|           | -3 | -2 | -1 | 0 | 1 | 2 | 3 |     |      |

Supplement: supp [file elife-29736-supp-v1.zip › elife_poa_e29736_Figure_3_figure_supplement_1.pdf]

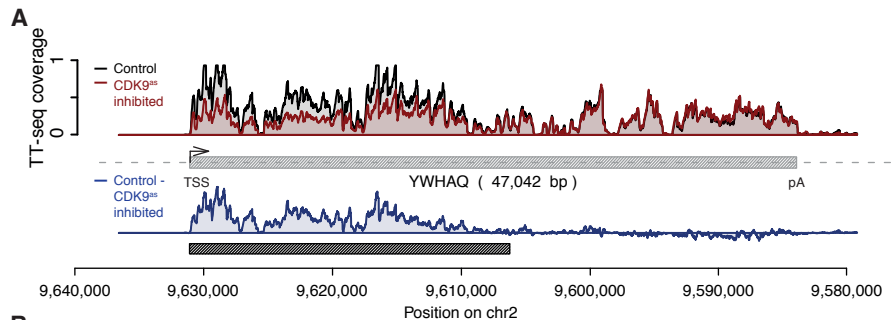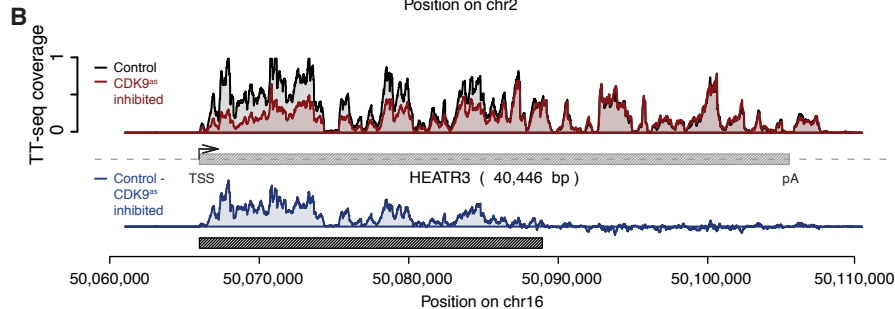

**C**

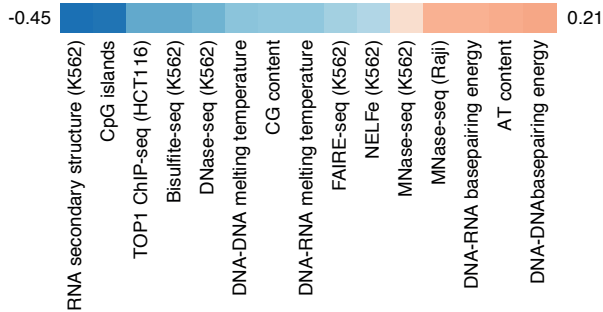

Supplement: supp [file elife-29736-supp-v1.zip › elife_poa_e29736_Figure_2_figure_supplement_1.pdf]
